# Supplementary material for: BF3·OEt2-mediated cycloaddition of O-tert-butyldimethylsilyloximes having olefin moieties: intramolecular cycloaddition of N-borano-nitronesElectronic supplementary information (ESI) available: experimental details. See http://www.rsc.org/suppdata/cc/b2/b201423h/
Source: Royal Society of Chemistry journal article supplement (doi:10.1039/b201423h), 2002-04-18
Supplement: b201423h.doc [file b201423h.doc]

# Supplementary data

**BF3•OEt2-mediated cycloaddition of *O*-*tert*-butyldimethylsilyloximes having olefin moieties: intramolecular cycloaddition of *N*-borano-nitrones (B201423H)**

Osamu Tamura,* Takahiro Mitsuya and Hiroyuki Ishibashi*

Faculty of Pharmaceutical Sciences, Kanazawa University, Takara-machi, Kanazawa 920-0934, Japan.

E-mail: tamura@dbs.p.kanazawa-u.ac.jp

**General Procedure**. To a stirred solution of an *O-tert*-butyldimethylsilyloxime **1** (0.2 mmol) in dry CH2Cl2 (2 ml) was added BF3•OEt2 (53 l, 0.42 mmol) at 0 °C under a nitrogen atmosphere. The mixture was allowed to warm to room temperature, and the mixture was further stirred for a period indicated Table 1 or 2. The mixture was poured into an aqueous saturated solution of NaHCO3, and the whole was extracted with CHCl3. After drying (MgSO4), concentration under reduced pressure gave a crude product, which was purified by column chromatography on silica gel (hexane-AcOEt) to afford **3** or **5**. Spectral data of **3a-f** and **5** are listed below.

**(1*R**,4*S**,5*S**)-2-Aza-3,7-dioxa-4-phenylbicyclo[3,3,0]octane (3a).** (Found: M+, 191.0936. C11H13NO2 requires *M*, 191.0946); max(CHCl3)/cm-1 3013, 2868; H (270 MHz, CDCl3) 3.24 (1H, br dtd, *J* 2.7, 6.0, 8.5), 3.75 (1H, dd, *J* 5.1, 10.0), 3.83 (1H, dd, *J* 6.5, 9.2), 3.87 (1H, dd, *J* 2.2, 10.0), 3.97 (1H, dd, *J* 2.7, 9.2), 4.27 (1H, m), 4.65 (1H, d, *J* 5.3), 7.37 (5H, br s), one proton due to NH was not observed probably because it was too broad to be detected; C (67.8 MHz, CDCl3) 68.8 (br), 72.5 (br), 58 (br), 92 (br), 127.0, 128.8, 129.2, 138.7.

**(1*R**,4*R**,5*S**)-2-Aza-3,7-dioxa-4-phenylbicyclo[3,3,0]octane (3b).** (Found: M+, 191.0939. C11H13NO2 requires *M*, 191.0946); max(CHCl3)/cm-1 3013, 2862; H (270 MHz, CDCl3) 3.27-3.42 (2H, m), 3.51 (1H, dd, *J* 6.9, 9.2), 3.79 (1H, dd, *J* 4.4, 9.6), 4.01 (1H, dd, *J* 6.9, 9.6), 4.30 (1H, dt, *J* 4.4, 8.2), 4.88 (1H, d, *J* 6.3), 5.64 (1H, br), 7.24-7.39 (5H, m); C (67.8 MHz, CDCl3) 53.0, 67.3, 69.9, 75.1, 88.0, 126.8, 128.1, 128.8, 136.4.

**(1*R**,5*S**)-2-Aza-3,7-dioxa-4,4-dimethylbicyclo[3,3,0]octane (3c).** (Found: M+, 143.0933. C7H13NO2 requires *M*, 143.0946); max(CHCl3)/cm-1 3013, 2980, 2866; H (270 MHz, CDCl3) 1.28 (3H, s), 1.32 (3H, s), 2.74 (1H, dt, *J* 4.0, 7.6), 3.64 (1H, dd, *J* 7.6, 9.5), 3.75 (1H, dd, *J* 4.1, 9.5), 3.79 (1H, dd, *J* 5.6, 9.5), 3.88 (1H, dd, *J* 4.0, 7.6), 4.16 (1H, br td, *J* 4.5, 7.6), one proton due to NH was not observed probably because it was too broad to be detected; C (67.8 MHz, CDCl3) 21.0, 26.2, 57.1, 67.4, 69.6, 73.0, 84.7.

**(1*R**,4*S**,5*R**)-2,7-Diaza-3-oxa-7-benzyloxycarbonyl-4-phenylbicyclo[3,3,0]octane (3d).** (Found: M+, 324.1476. C19H20N2O3 requires *M*, 324.1474); max(CHCl3)/cm-1 3013, 1697; H (270 MHz, CDCl3) 3.24 (1H, br), 3.64 (2H, br), 3.72 (2H, br), 4.22 (1H, td, *J* 4.8, 7.9), 4.74 (1H, br s), 5.15 (2H, s), 5.41 (1H, br), 7.27-7.44 (10H, m); C (67.8 MHz, CDCl3) 50.5 (br), 55 (br), 66 (br), 91 (br), 67.5, 126.6, 128.4, 128.5, 128.7, 128.9, 129.2, 136.9, 138.9, 155.2.

**(1*S**,5*R**)-2-Aza-3-oxa-4-phenylbicyclo[3,3,0]octane (3e).** (Found: M+, 189.1155. C12H15NO requires *M*, 189.1154); max(CHCl3)/cm-1 3011, 2961, 2870; H (270 MHz, CDCl3) 1.10-2.01 (6H, m), 3.02 (1/2H, br), 3.12 (1/2H, td, *J* 6.6, 8.1), 4.00-4.13 (1H, m), 4.51 (1/2H, br), 4.82 (1/2H, d, *J* 6.6), 4.90-5.09 (1H, br), 7.22-7.42 (m, 5H); C (67.8 MHz, CDCl3) 24.8, 26.5, 28.6, 31.3, 32.1, 35.5, 52.3, 56.6, 67.3, 67.9, 88.8, 91.3, 126.4, 126.7, 127.4, 128.2, 128.4, 128.9, 137.9, 140.1.

**2-(2-Oxo-2-phenylethyl)-1,2,3,4-tetrahydropyridine *N*-Oxide (5)**. (Found: M+, 217.1103. C13H15NO2 requires *M*, 217.1103); max(CHCl3)/cm-1 2361, 1686; H (270 MHz, CDCl3) 1.69-2.33 (4H, m), 2.47 (2H, m), 3.19 (1H, dd, *J* 9.2, 17.5), 4.23 (1H, dd, *J* 3.3, 17.5), 4.43 (1H, m), 7.22 (1H, t, *J* 3.9), 7.38-7.66 (3H, m), 7.94-8.05 (2H, m); C (67.8 MHz, CDCl3) 16.3, 26.4, 28.5, 41.7, 64.1, 128.6, 129.1, 129.1, 133.5, 133.8, 180.4.
